# Supplementary material for: Isocitrate Dehydrogenase Mutations Confer Dasatinib Hypersensitivity and SRC Dependence in Intrahepatic Cholangiocarcinoma
Source: Oxford University Press journal article supplement (doi:10.1158/2159-8290.cd-15-1442), 2016-05-26
Supplement: 21598290cd151442-sup-159120_2_supp_3483139_l6rl72.xlsx [file 21598290cd151442-sup-159120_2_supp_3483139_l6rl72.xlsx]

## Sheet: Sheet1
				Cell ID	1466	1467	653	1317	1464	1469	1310	1318	1465	664	1309	1312	1313	1314	1316	1323	1468
				ICC	Ampulla of Vater	Ampulla of Vater	Extrahepatic cholangiocarcinoma	Extrahepatic cholangiocarcinoma	Extrahepatic cholangiocarcinoma	Extrahepatic cholangiocarcinoma	Gall bladder	Gall bladder	Gall Bladder	Intrahepatic cholangiocarcinoma	Intrahepatic cholangiocarcinoma	Intrahepatic cholangiocarcinoma	Intrahepatic cholangiocarcinoma	Intrahepatic cholangiocarcinoma	Intrahepatic cholangiocarcinoma	Intrahepatic cholangiocarcinoma	Intrahepatic cholangiocarcinoma
				Cell Name	SNU-478	SNU-869	EGI-1	TFK-1	SNU-245	SNU-1196	G-415	TGBC14TKB	SNU-308	HuCCT1	CCSWI	KMCH-1	RBE	SG231	SSP-25	YSCCC	SNU-1079
Drug_ID	Drug Name	Target	Screen_Max Concentration(uM)		Ln_IC50	Ln_IC50	Ln_IC50	Ln_IC50	Ln_IC50	Ln_IC50	Ln_IC50	Ln_IC50	Ln_IC50	Ln_IC50	Ln_IC50	Ln_IC50	Ln_IC50	Ln_IC50	Ln_IC50	Ln_IC50	Ln_IC50
422	Elesclomol	HSP70	0.256		-3.68406	2.30419	-2.26615	1.61918	0.295213	-1.62074	-3.66543	-3.95971	2.29844	-4.50224	-3.85592	1.07486	-3.63463	1.27437	-3.27116	0.967276	-4.10516
418	AZD7762	CHK1,2	2		-1.95759	3.4578	0.251731	2.93817	-0.116992	-1.65082	-1.08607	-0.9292	0.763549	-0.688949	-0.934116	-0.242552	-1.59979	-1.15125	-1.20314	3.03227	-0.531009
419	17-AAG	HSP90	2		-2.0473	2.79567	-1.37113	2.51503	-1.7988	-3.55529	-5.33733	-3.98068	0.880192	-2.48258	-7.17613	-3.02962	-0.969469	-2.36492	-5.69567	2.29704	0.595669
385	ABT-263	BCL-2 / BCL-XL	5.12		3.53925	0.273568	2.2764	4.24366	1.82911	2.51378	1.31536	-0.505953	3.72311	4.34873	1.45182	0.812019	0.025188	3.43857	3.36586	4.43706	-0.148151
425	PD-0332991	CDK4/6	5.12		3.39442	6.5136	4.87503	6.99773	4.79087	4.34998	2.83843	5.57388	6.97685	4.28613	6.39759	4.82574	3.8937	6.6189	5.40294	6.6952	5.89639
420	VX-702	p38 MAPK	5.12		4.80618	4.39375	4.78744	5.07486	6.14416	6.11012	5.15442	6.61698	6.03247	5.25754	4.71858	4.58196	4.10097	5.05765	4.9512	5.41943	4.94105
417	AZD2281	PARP1/2	2.56		4.89796	3.27288	5.84319	5.16921	5.67954	5.98411	6.17421	5.86925	6.04891	5.68586	5.13516	3.94472	5.38148	4.97421	4.70839	2.92446	5.35791
421	KU-55933	ATM	5.12		4.88756	5.74594	6.69019	5.74105	6.17913	6.44666	6.76678	6.88981	6.33441	5.0992	6.05411	5.9186	6.43757	6.29573	5.11259	4.57827	6.59468
423	GDC-0449	SMO	10.24		7.16337	7.30418	5.63868	6.70595	7.36556	7.21717	7.12781	6.76854	6.85213	5.12332	6.95691	5.41446	6.81012	6.56829	6.58071	5.95421	7.37473
97	AZD6244	MEK1,2	10		0.178924	6.50595	3.19505	6.17577	-0.323655	6.17399	1.23429	1.73627	9.11429	2.80925	0.961446	1.12202	-1.37935	4.88635	5.11226	6.56234	3.87832
99	AZD6474/Zactima	VEGFR / EGFR / RET	10		-1.42874	7.1869	2.45441	6.62418	1.59922	0.37319	3.78786	4.99022	5.0248	2.46615	0.253204	-0.840508	-0.93873	4.56022	1.529	7.3499	-1.50277
213	AZD5582	IAP	0.256		0.595874	2.87093	1.42016	3.84438	3.37718	2.59361	1.41553	2.5949	3.54112	0.288873	2.2154	2.95551	1.1609	1.43262	2.91849	1.02824	3.62772
98	AZD1152	Aurora B	16		4.3433	7.98393	7.01256	7.76853	3.44845	5.22667	3.73964	4.71618	6.96386	6.3816	5.5052	5.93222	7.02248	6.96553	7.9679	7.25517	6.95746
201	Epothilone B	Tubulin	0.032		-6.70705	0.873405	-3.29326	-0.163352	-3.95743	-5.09005	-4.3606	-1.86085	-2.66842	-4.82594	-7.46323	-2.82732	-4.0443	-1.63237	-6.78561	1.2652	-3.68293
182	Obatoclax Mesylate	BCL2 family	16		-1.51699	2.67621	0.829333	3.61954	2.66816	-1.41627	-3.5888	-2.13716	2.87895	-1.27803	-1.16317	-0.287246	-2.90841	0.120744	-1.71269	5.84678	-3.77641
194	NVP-AUY922	HSP90	0.256		-3.93381	2.46103	-1.57637	2.35471	1.60125	-3.0558	-2.75496	-2.86228	1.13232	-2.00599	-4.68703	-2.32057	-2.69276	-1.58306	-4.16961	3.33588	-1.10146
200	LAQ824	HDAC	1.024		-3.83342	1.14207	-1.82353	-1.73139	-3.02993	-3.44017	-3.11958	-2.96075	-1.05079	-2.46169	-4.93595	-2.28167	-2.54725	-1.7363	-3.27899	4.05956	-4.71858
272	AR-42	HDAC	5.12		-2.06746	2.79374	1.282	-0.108779	0.249278	-0.87788	0.065323	-0.606108	0.75043	-0.076362	-2.17764	-0.488881	-2.14022	-0.813365	-1.2666	-1.35265	-2.40935
268	YM155	Survivin	5.12		-8.2081	-3.24639	-6.38204	-3.18817	1.38983	-6.41535	-1.95484	-0.336896	-1.17946	-9.64648	-2.92387	-6.3136	-1.77321	-12.4767	-5.05299	-3.80674	-4.78238
11	Taxol	Tubulin	0.1024		-5.70411	2.70993	-1.5395	1.88186	-1.96736	-4.62452	-3.27564	-0.474423	-1.43651	-4.14016	-5.3758	-1.45192	-1.7134	-0.596846	-4.60942	2.5482	-0.84051
273	CUDC-101	HDAC + EGFR Dual Targeting	5.12		-2.14253	2.301	1.14822	0.771233	1.67739	-0.715662	0.7673	0.640086	1.90074	-0.702267	-2.84052	-1.10363	-1.68998	0.128524	-0.733927	0.763815	-0.629302
274	PXD101 / Belinostat	HDAC	20		-1.90526	3.13607	1.49348	0.911601	0.789662	-0.741698	0.276725	0.90204	1.35715	-0.078909	-1.9416	-0.268758	-1.24981	-0.277798	-0.749077	-0.198902	-1.95087
135	Gemcitabine	DNA	1.024		-5.92487	5.0087	2.20284	2.59342	-1.96356	-3.22044	0.688438	2.40316	1.67888	-1.37884	-7.36293	0.999471	-0.414413	3.37335	-4.81109	4.42212	3.37209
276	CAY10603	HDAC6	20		0.409755	3.76736	2.83226	1.43938	2.05671	0.259205	0.946269	0.783928	2.13008	0.890549	-1.35498	0.464662	-0.226473	0.313773	-0.266189	0.753944	-1.07398
262	VX-11e	ERK	5.12		-0.341248	6.45085	2.22501	5.78763	1.99186	4.38957	1.34226	1.79389	5.38294	4.06334	2.28622	1.80703	0.136415	3.28353	5.49102	6.50295	2.11028
275	I-BET 762	BRD	20		2.47571	5.27183	8.19936	6.55935	5.49172	6.02128	4.60106	4.78908	6.21704	7.5459	1.90398	2.24857	0.497465	4.73688	5.70818	5.30625	0.347571
208	SB-715992	Eg5	0.128		-4.34255	2.27181	-1.60227	2.52768	1.61071	0.051536	-2.80108	-2.89153	-0.166578	-0.197128	-4.39333	-2.31959	1.65564	-2.04045	-4.3668	-0.355485	1.25626
190	Bleomycin	DNA Breaks	64		0.111998	8.7926	5.37375	7.52747	1.59353	1.4433	0.923918	4.27819	6.44936	2.88784	1.48186	3.0124	2.05597	6.83636	-2.68221	8.58935	1.37264
424	MK-2206	AKT	10.24		2.74571	7.06291	5.03221	6.98238	5.00633	3.10479	4.41911	4.24404	7.47853	3.22999	2.00492	3.32622	2.16433	7.16896	2.08605	7.09018	2.44631
270	AZ3146	MPS1	20		2.16475	6.75762	6.7509	6.24183	4.78602	3.25424	4.8085	4.20336	6.4	7.64619	2.91944	2.8681	2.27386	4.46656	5.73935	6.67375	4.68973
134	Etoposide	Topoisomerase II	16		-0.558157	5.71442	2.96319	4.30271	4.04087	0.701298	1.76151	1.97389	4.49496	2.99254	-0.237453	0.857558	2.31686	3.59732	-0.337239	6.7849	2.66922
265	Tubastatin A	HDAC6	20		5.13023	5.83668	8.59431	6.15675	6.31235	6.31249	4.53398	5.83595	8.20974	3.05874	3.67749	5.06532	3.27652	5.68443	3.9869	4.80186	3.16531
173	FH535	Wnt pathway	32		4.07454	2.17953	6.64749	4.94878	3.29775	2.87184	1.63011	1.99544	4.20226	3.16858	4.08805	5.76091	3.34977	5.22853	2.78819	4.61352	2.2047
139	Irinotecan	Topo I	32		1.70863	4.66991	4.46276	5.31598	3.03015	1.71378	3.91371	4.3154	4.89915	4.21869	1.06257	4.67245	3.48549	4.7291	1.77071	8.45259	3.31576
199	Pazopanib	VEGF / RTK	8		6.68905	6.10376	6.86407	6.28418	6.121	4.13153	5.84986	4.51172	4.69501	6.00226	5.22351	4.79623	4.54758	5.86499	4.83795	5.53375	4.30725
202	GSK1904529A	IGF1R	1.024		4.12404	4.88324	5.13658	4.7095	4.78519	3.93364	5.15893	4.99449	4.95971	3.46663	5.05967	4.93052	4.76467	5.13987	3.83343	4.89729	3.48493
271	VNLG/124	HDAC+RAR Dual Targeting	5.12		6.27444	6.73283	6.11576	6.84357	5.82496	6.27239	5.18484	4.30955	6.64979	5.82606	4.99464	4.64195	5.14074	6.39412	3.09654	5.92365	6.4291
328	SNX-2112	HSP90	2.56		-1.11573	2.56855	-0.541483	2.29039	0.502982	-1.45689	-1.29139	-1.73594	2.40866	-0.955733	-2.65102	-2.22005	5.54886	-2.21772	-2.04997	0.74211	1.265
206	INCB-18424	JAK1,2 / Tyk2	5.24		4.34124	7.12864	5.29213	6.92221	6.75806	6.33108	6.73075	6.43496	6.68114	5.58931	6.40526	6.57731	5.93447	5.90202	5.69308	4.7766	6.77035
167	OSU-03012	PDK1	16		1.29181	6.47506	2.51826	5.47746	3.355	4.50772	5.01181	6.1372	5.55924	2.65236	5.42188	3.6635	5.95982	5.82938	2.48449	7.60271	6.22398
177	GSK650394	SGK	16		2.97443	4.66625	4.86826	7.20091	4.81433	6.00733	5.44875	5.20371	6.34703	5.86959	6.67972	5.63973	6.31593	7.05426	3.27507	6.26529	7.99503
258	STF-62247	Autophagy	10.24		4.49972	7.55292	4.86281	7.22032	7.53987	7.71426	6.28728	5.93223	7.45949	4.85244	7.41292	6.22138	6.44128	6.42527	3.53022	7.57453	2.43316
266	Zibotentan / ZD4054	Endothelin A Receptor	20		5.774	8.0514	7.45948	7.97981	6.76072	7.25175	7.2736	8.1945	8.0005	6.72921	6.93068	7.27829	6.52854	7.27428	8.07617	8.31278	7.36233
333	T0901317	LXR	10.24		6.71305	7.53282	6.12428	6.75242	5.67711	6.85083	6.66218	7.55307	6.66839	7.00527	5.52155	4.65459	6.72538	6.58023	5.43845	5.90929	6.16182
238	CAL-101	PI3Kdelta	20		3.94502	7.05332	5.20748	7.51657	5.90223	5.87003	5.85291	5.59416	6.00419	4.0064	6.51402	4.90725	6.78692	5.26956	3.7567	4.65756	2.87069
196	Phenformin	Complex I	4000		3.11417	13.7147	16.4575	9.82721	10.2414	11.1136	7.00674	7.61424	12.7705	10.6127	8.0553	8.36431	7.1044	6.47666	5.64718	7.05887	8.65347
269	NSC-207895	MDMX	20		3.90132	4.88258	6.30509	6.12827	7.26938	7.54237	4.72545	4.71766	6.38333	4.74306	7.44042	3.40296	7.32016	3.24148	4.61294	6.01739	4.99269
300	CX-5461	RNA Pol I	10.24		-0.738417	7.06209	7.71794	5.82468	6.04797	-0.08286	2.42478	1.43464	6.97122	1.28019	1.72668	2.89965	7.33895	4.78696	0.541863	6.37425	5.54094
205	BMS-708163	gamma-Secretase	10.24		5.8583	7.49519	7.04751	6.94365	6.7489	7.0661	7.54064	7.62733	6.3977	7.22582	6.6122	7.22245	7.4175	6.74083	6.58906	5.39881	7.2674
341	EX-527	SIRT1	20		8.14106	8.40971	6.70364	8.06033	8.01968	8.11212	7.41457	6.92506	8.29753	7.05402	7.38941	7.04584	8.0546	7.86759	8.19699	8.03996	8.1813
179	5-Fluorouracil	Antimetabolite	32		-2.81986	6.26698	5.82769	8.05756	3.89466	1.68619	3.72295	3.59457	8.68477	2.14097	3.27132	3.21896	8.07066	2.92772	2.8756	4.17548	3.27936
193	GW-2580	CSF1R	20		8.21856	7.76006	7.23764	8.24946	5.81694	7.61581	7.6609	7.64923	8.24288	7.16449	6.69378	5.9466	8.1834	7.74442	5.01499	7.02854	7.4383
104	Bortezomib	Proteasome	0.02		-5.61043	-3.45807	-0.811435	-3.66117	-5.4154	-3.83401	-5.20012	-5.87232	-3.79376	-4.07072	-4.18075	-4.95714	-5.0066	-4.79561	-5.96942	0.349966	-4.50264
313	Asparaginase / elspar	Gln, Asn	1.024		3.93247	5.20497	2.79301	0.115428	0.939238	1.46434	-0.817684	-1.67992	1.8238	3.67035	1.06457	-2.96406	2.45754	-1.93761	-4.30629	0.991936	1.05172
282	EKB-569	EGFR	2.5		-5.0734	5.75971	2.03893	6.39588	4.13115	0.676184	2.07011	1.13899	5.26787	0.493282	0.027141	0.744369	-0.650521	1.09144	1.03048	-2.04535	-7.71281
283	GSK2126458	PI3K / mTORC	0.128		-4.60824	0.75189	-3.96652	3.11621	-4.26778	-3.71537	-2.56859	-2.70853	-0.367247	-4.08893	-3.89521	-2.03967	-0.584658	-2.09072	-4.13769	-4.11152	-4.89736
305	TPCA-1	IKK	20		3.79862	6.08781	3.36184	6.0154	3.93378	3.04719	2.53139	3.88175	4.6169	3.52759	2.83254	3.2218	0.217617	3.87108	3.93987	5.79698	0.646871
310	YM201636	PYKfive	5.12		4.66495	4.36741	3.28848	3.64552	2.15177	2.31968	2.44634	2.2682	2.72818	2.03343	1.71539	1.16849	0.664524	1.54366	5.17728	5.24426	0.660719
278	AZD1480	JAK2	20		1.97197	7.08292	2.14449	7.93743	4.58463	1.64772	3.18265	3.49982	8.07396	5.93127	1.18575	6.80709	0.88519	3.51025	1.09488	7.07185	0.586264
306	TG101348	JAK2	10.24		1.46503	6.30574	6.39899	4.09726	1.38067	2.91099	1.43967	1.33613	4.16876	5.39271	1.6623	2.10346	1.76335	1.77351	2.33126	3.7603	2.3146
279	BIX02189	MEK5	20		6.54587	7.94555	5.84285	7.61635	5.35474	3.95314	3.09377	3.72908	6.26007	4.10297	5.10442	5.38756	2.74543	4.11056	4.99444	6.95535	5.47523
277	ABT-869	RTK	1.024		4.4114	4.55093	3.95356	4.92732	3.08579	3.04183	4.48224	4.62065	4.51914	2.04351	4.12038	3.95545	5.14832	5.08094	2.23488	3.96435	4.58049
301	PHA-793887	CDK	10.24		-3.97194	5.36538	6.5011	4.13026	6.60109	2.7857	1.72906	1.17835	6.23983	1.67452	1.81266	0.458621	5.70491	2.27681	0.323022	3.32239	3.50866
293	MP470	PDGFR	20		4.77695	4.95105	6.2047	7.69045	5.44515	7.7224	7.59082	7.31602	6.328	7.63483	4.4419	5.81808	5.78093	4.66474	2.90921	5.50075	6.26754
326	GSK690693	AKT	10.24		3.52954	7.28262	7.15642	6.57759	4.77293	8.08317	4.03471	3.66228	5.42252	5.54673	4.43859	5.14748	6.01657	5.19232	4.49727	3.8348	3.30198
299	OSI-027	mTORC1/2	20		-2.98484	7.9739	-2.07455	6.0183	0.135598	0.6731	-0.677425	-0.944442	6.31819	-2.23577	0.281408	2.67583	6.50562	-0.145508	0.367041	0.319719	0.138949
302	PI-103	PI3Ka, DNAPK	10.24		-2.71618	5.82454	4.73241	5.30867	6.11364	-1.26921	-0.280521	-0.317417	6.63033	-0.132053	0.430168	0.880952	6.8889	0.674477	1.43023	0.807501	2.43403
309	Y-39983	Rock	20		3.74584	7.90972	7.26317	6.06692	7.50753	6.00815	3.70077	4.31505	5.5218	6.35492	5.85782	5.6797	7.01588	6.69804	6.04798	5.56521	7.16691
292	Masitinib	KIT	20		5.92774	7.35041	7.37982	7.82025	5.1399	4.90464	6.47096	5.17575	6.61155	7.12157	7.17072	6.71635	7.62083	6.99206	4.04348	6.83256	7.83854
308	XL-880	MET	5.12		-0.240042	2.70816	0.09775	3.57422	1.29291	-0.861249	0.292617	0.527857	2.72964	-0.135961	-0.173241	0.55509	-0.807941	0.499944	-0.389754	4.34346	-0.947353
249	XL-184	MET / VEGFR	5.12		2.97378	4.00729	2.90879	6.77301	3.58175	1.58611	2.94142	5.42425	6.69696	2.46529	2.77156	4.12858	1.622	3.76452	3.11164	6.59751	2.81679
88	MS275	HDAC	5		-0.925787	3.19408	4.42628	2.44074	0.778827	1.80119	0.631231	1.04032	3.91681	0.881375	-0.851299	3.44946	4.01089	2.17428	0.45014	4.56827	-0.980633
110	Seliciclib	Cdk	16		5.03706	7.49141	4.7058	7.67157	4.47765	5.4246	5.78955	5.36502	7.00037	5.04276	5.67403	6.07257	3.30395	4.89342	6.8738	7.03152	4.88417
119	Lapatinib	EGFR / ERBB2	5.12		-0.59456	5.59619	3.70366	5.98301	0.350883	5.01883	5.85115	5.79216	4.68291	2.47833	0.857093	-0.331428	1.93786	5.83589	2.47991	6.17662	-0.365839
163	JQ1	Bromodomain	2.56		0.427416	4.79262	5.48499	5.7809	0.971878	3.20366	2.82044	2.30254	2.84549	5.21621	-0.887101	1.42063	-1.41482	3.93989	2.5527	5.75409	-1.53621
30	Sorafenib	RAF / KIT / VEGFR	4		2.85895	3.46701	5.56925	5.34616	5.65757	5.20296	5.11551	4.78668	5.88831	2.52105	3.11211	3.22442	3.70961	3.81534	4.55308	5.05608	5.76575
370	AZD8055	mTORC1/2	5.12		-2.15615	3.77033	-0.879503	4.78238	1.08667	-1.88509	-1.8032	-1.14582	6.58321	-1.14336	-1.29575	1.73331	-2.09565	3.67247	-1.53651	5.37948	-2.40846
373	GDC0941	PI3K class 1	5.12		-0.370674	3.8384	1.93221	5.01052	2.26142	1.06466	1.48209	2.21425	5.08642	0.782185	0.366124	1.51808	-0.729162	5.27074	0.37708	6.07992	-0.719464
359	Gefitinib	EGFR	10.24		-0.735719	7.50912	7.63645	7.60003	5.02467	6.22796	4.76843	5.98337	4.4255	4.40821	4.99305	0.864437	2.91054	6.98908	4.30157	7.3629	0.252729
157	JNK-9L	JNK / CDK9	5.12		0.566746	6.27497	1.64831	5.81353	0.107489	1.49379	0.788695	1.1785	0.9278	0.418432	-0.08347	-0.09327	-0.506209	0.599305	1.38601	5.90931	-0.613754
155	Ponatinib /AP24534	Bcr-Abl	0.512		2.10622	4.68273	4.46224	3.52105	4.3961	1.29604	-0.111894	1.86079	3.11558	4.26402	1.52025	2.65029	0.039751	3.63861	2.04632	4.36163	-0.649388
223	ZSTK474	PI3Kalpha	5.12		-0.972485	2.63733	0.471728	4.97914	2.70491	0.309173	1.0631	0.524924	3.20096	-0.677656	1.10378	1.38749	1.0418	1.06819	0.394325	1.10217	-1.50347
228	KIN001-102	AKT1	10.24		2.15715	3.4739	4.14081	7.12899	5.31569	3.38397	3.21493	3.18051	2.92857	3.30852	1.46406	2.01384	1.1692	2.10594	1.14481	1.66204	1.95177
158	PF-562271	FAK	2.56		1.61504	3.67968	2.94042	5.99071	1.83194	3.23031	5.05922	5.91152	4.41366	5.61743	1.02271	4.89546	1.39085	4.67491	3.22851	5.75367	1.14925
222	KIN001-175 / BX-912	PDK1	10.24		1.15439	5.80113	4.9666	7.34646	6.3543	3.5262	2.5435	2.36533	5.97239	3.37237	3.0149	2.78306	1.6755	4.05965	1.12547	4.09248	2.90001
225	Genentech Cpd 10	Aurora	10.24		2.85194	6.92846	6.87823	7.55228	6.74508	3.42858	2.6645	1.97534	6.37575	6.33991	2.07793	1.47291	1.72213	1.13784	-0.015437	1.86052	-0.041848
156	AZD6482	PI3Kbeta	5.12		0.659304	6.74588	5.51433	6.27141	5.24894	3.03864	3.50758	4.29703	4.26735	3.95808	3.10101	4.27508	1.80975	5.63084	4.03408	6.43962	1.67545
226	GSK1070916	Aurora B	2.56		1.07482	5.60069	5.26742	5.70425	4.77524	6.74418	1.94745	2.57401	4.10909	6.32367	2.8903	2.44398	2.15938	3.58868	0.08379	1.37788	2.99406
154	CHIR-99021	GSK3beta	2.56		4.13197	6.12671	3.95832	4.40633	3.21969	6.02895	3.96505	3.67752	5.45275	3.11242	3.13913	3.59408	2.45125	4.32669	2.77557	5.30761	0.462452
210	PLX4032	BRAF	10.24		2.10677	6.28927	6.55347	7.23224	4.79385	3.62214	2.87473	3.26867	4.7586	2.12922	4.43942	6.46895	3.36797	7.17278	4.17962	7.11311	2.30253
230	GSK429286A	Rock 2	20		4.49272	8.2352	8.32263	7.1463	7.76229	8.15897	5.76274	6.04288	7.20553	7.463	6.16356	6.95393	3.79436	6.36961	3.0069	5.70897	8.00958
235	QL-XII-47	BTK, BMX	10.24		-0.0124	7.4141	0.954158	6.11667	6.2325	0.454152	0.792959	-0.60038	5.10304	-0.213581	-0.379072	-0.244335	5.60712	0.126437	-1.32315	-1.22454	0.25396
221	TAK-715	p38a	20		5.49226	6.78134	3.47221	8.18399	8.21883	3.83337	5.47551	4.52295	7.21909	5.02044	3.18439	4.55814	6.18165	5.89247	3.24739	4.52327	5.19974
229	LY317615 / Enzastaurin	PKCbeta	20		3.17267	7.21777	6.50775	6.52458	5.80384	2.78478	1.15728	-0.231608	1.3293	2.08375	0.683642	1.98538	6.2218	0.376255	-0.785612	-0.526342	0.040203
152	CP466722	ATM	16		1.32535	2.99813	2.48883	7.2218	2.77271	2.49375	1.45577	1.39518	4.68214	1.55808	2.09814	1.88716	1.70498	1.61431	1.53519	1.43745	1.33097
219	AT-7519	CDK9	10.24		-1.63528	5.51611	1.24129	4.11873	6.38715	-0.672437	1.72822	0.703438	3.82335	0.112255	-0.154128	0.575405	5.36129	1.72531	-0.256671	0.148035	-0.75036
203	BMS-345541	IKK-2	16		0.593516	5.52182	7.03215	8.01475	6.1615	2.30288	1.90714	2.09821	6.38048	5.56098	5.34729	5.03901	7.44059	2.2989	1.13205	2.5758	2.63148
224	AS605240	PI3Kgamma	20		1.42962	6.56208	2.03267	6.17565	6.35653	5.93569	2.18805	2.25074	7.76519	5.39699	1.66767	5.00578	-0.521545	1.73291	4.30334	2.02332	0.808835
252	WZ3105	CLK2 / CNSK1E / FLT3 / ULK1	1.28		-2.09926	2.46193	4.11237	2.07725	4.38238	-0.757497	0.241159	-0.338015	3.55157	-0.332029	0.961439	-0.647422	0.864229	-0.333502	-1.08526	0.427972	2.88571
295	NVP-BHG712	EPHB4	10.24		4.77056	7.01108	3.27273	7.52305	3.61223	3.99693	2.61128	2.10502	6.61315	5.30793	5.00572	3.25345	1.34139	3.5439	6.97622	7.49094	3.10798
312	AV-951	VEGFR	0.128		1.65556	3.21977	2.90078	1.7849	1.43339	2.66876	3.03288	2.00405	2.57517	0.734257	2.73607	2.46845	2.70992	1.24156	1.06054	1.60002	2.37155
303	PIK-93	PI4KIII, PI3K	20		5.43759	3.97683	2.90026	5.4794	3.74929	2.67418	2.28061	2.9862	4.63353	2.41641	4.12067	1.92899	2.74556	5.23269	3.49437	5.00114	2.70002
254	AC220	FLT3	1.024		2.38115	4.86651	4.38979	4.39533	1.63229	4.40192	4.7085	4.60454	4.97904	4.79448	5.15988	1.60721	3.61288	4.2951	3.83991	4.0656	4.15231
253	XMD14-99	EphB3 / CAMK1	10.24		3.85153	7.35881	6.22596	7.63179	6.28116	6.95398	7.11343	7.46644	6.61323	4.33984	7.24341	3.62273	5.45725	6.76727	3.41286	5.59464	4.77812
255	CP724714	HER 2	10.24		3.94158	6.45096	5.57101	6.19922	5.54992	5.92956	7.31177	7.73635	5.01928	5.8445	5.53519	4.61454	7.40938	5.12313	3.94658	3.4628	6.73425
298	OSI-930	KIT / VEGFR / PDGFR	10.24		4.33911	6.13494	6.43218	7.62681	5.96352	6.84508	5.92713	3.74442	7.45782	5.60441	5.51767	4.72252	7.44482	5.22597	4.64059	7.36561	4.72551
304	SB52334	ALK5	20		6.8296	5.89953	5.72585	7.56198	6.46315	3.90158	4.51199	6.69411	6.28697	7.46319	5.11106	4.90147	7.47343	5.68379	6.75328	8.29464	3.27746
51	Dasatinib	Bcr-Abl, SRC family	1.28		-3.17389	4.87164	0.293139	4.32477	2.24337	-1.88996	-0.238425	-0.167337	3.23453	-1.71152	-3.15663	-3.8756	-8.86627	3.72794	-2.71971	3.85588	-7.89739
38	AZD0530 / Saracatinib	SRC family	2		0.906803	5.48266	1.69978	5.46557	1.86367	2.02294	2.48052	3.62038	3.16574	5.76396	-0.279504	-0.531143	-1.70454	4.70473	2.18858	4.29313	-1.69405
60	BI-2536	PLK1,2,3	0.256		-3.04707	3.58756	2.06489	2.44423	-0.229587	-1.03884	-1.19203	2.3565	1.99366	-1.30523	-3.47212	-0.053984	-0.925586	-0.37394	-3.86668	3.17855	-0.471077
37	Crizotinib/ PF02341066	ALK / MET	2		2.20729	6.0037	4.83581	5.23746	3.17592	2.55769	3.14236	4.77233	4.36868	2.96647	2.18149	3.79501	1.56223	4.37628	1.79903	5.60342	3.45554
32	MK0457 / VX680	Aurora / FLT3	2		1.34252	6.13105	4.45833	5.63959	3.2679	3.47935	3.78362	4.23423	4.09658	2.37593	2.74459	3.13087	3.65411	4.54808	0.083067	5.61809	2.65116
36	PD-173074	FGFR	8		2.61567	7.33714	6.82038	6.8405	4.03987	6.14486	3.46732	5.0364	7.01978	3.50189	5.46708	4.9156	4.79446	6.89285	3.72511	6.83832	4.01775
125	BEZ235	PI3K	0.1		-3.02303	0.84389	-1.16218	1.33648	-0.324262	-1.8348	-2.58124	-1.84007	0.642208	-1.96473	-1.33826	-1.20179	-2.37727	0.857216	-2.81484	2.61276	-1.8854
126	RAD001	mTOR	0.1		-2.23236	0.167526	0.710474	0.658929	0.663162	-0.12065	0.601065	1.11562	1.18678	1.14382	-0.665648	-1.00287	0.189496	0.996857	0.497091	1.97499	-0.208684
113	BYL719	PI3Kalpha	5.12		3.98962	4.10867	2.67854	6.44335	2.91922	3.47127	3.25622	3.41392	6.09888	2.69846	2.29445	2.75082	1.13648	5.48684	4.70022	6.40838	2.16083
112	XAV939	Tankyrase	10		5.00245	6.38779	7.29551	7.3948	6.20236	7.27583	7.08058	6.86792	7.12866	4.4768	6.89869	5.96449	3.74858	7.18901	4.18906	7.18127	1.70991
232	Carfilzomib	Proteasome	0.256		-4.86481	-1.75393	-2.73292	2.96202	-1.30602	-2.57076	-4.34996	-7.52353	0.617722	-6.17344	-3.99416	-4.65925	-0.476418	-4.62172	-4.78015	-2.36681	-3.28318
128	PCI-34051	HDAC8	8		5.98303	4.96196	6.58715	5.95563	6.41094	6.52929	4.31109	6.28474	7.30175	3.05287	5.2169	4.67435	2.349	5.71619	5.41709	5.93138	2.10507
246	Nutlin	MDM2	10.24		7.08414	6.39767	6.58251	7.07671	6.32928	5.24164	7.46788	7.03684	7.71391	7.27679	7.03207	3.98545	1.72539	7.46203	6.16228	6.4708	2.48184
245	UNC0638	G9a	40		1.84292	7.94566	6.94905	5.14071	5.0108	5.0292	4.40017	6.5669	5.51893	4.26475	4.61555	2.23371	1.85149	4.99846	0.731836	5.21659	2.77849
145	STA-9090	HSP90	0.256		-2.76356	2.31234	-1.55798	0.755446	-0.721893	-2.32724	-2.64093	-2.78729	0.754354	-1.08074	-3.97041	-2.35846	-2.96905	-1.11743	-3.32106	3.60302	3.29999
