# Supplementary material for: Isocitrate Dehydrogenase Mutations Confer Dasatinib Hypersensitivity and SRC Dependence in Intrahepatic Cholangiocarcinoma
Source: Oxford University Press journal article supplement (doi:10.1158/2159-8290.cd-15-1442), 2016-05-26
Supplement: 21598290cd151442-sup-159120_2_supp_3483142_66r672.xlsx [file 21598290cd151442-sup-159120_2_supp_3483142_66r672.xlsx]

## Sheet: HuCCT1
HuCCT1 - DMSO vs Dasatinib
Protein	Gene	Description	PeptideCount	log2FC	SE	Tvalue	DF	pvalue	adj.pvalue
sp|P12931|SRC_HUMAN	SRC_HUMAN	Proto-oncogene tyrosine-protein kinase Src OS=Homo sapiens GN=SRC PE=1 SV=3	22	-5.71139	0.231528	-24.6683	121	0	0
sp|P07947|YES_HUMAN	YES_HUMAN	Tyrosine-protein kinase Yes OS=Homo sapiens GN=YES1 PE=1 SV=3	17	-5.56282	0.360673	-15.4235	81	0	0
sp|Q08345|DDR1_HUMAN	DDR1_HUMAN	Epithelial discoidin domain-containing receptor 1 OS=Homo sapiens GN=DDR1 PE=1 SV=1	9	-5.3034	0.290396	-18.2626	44	0	0
sp|P07948|LYN_HUMAN	LYN_HUMAN	Tyrosine-protein kinase Lyn OS=Homo sapiens GN=LYN PE=1 SV=3	15	-5.19947	0.333082	-15.6101	75	0	0
sp|P29317|EPHA2_HUMAN	EPHA2_HUMAN	Ephrin type-A receptor 2 OS=Homo sapiens GN=EPHA2 PE=1 SV=2	34	-4.91062	0.160701	-30.5576	198	0	0
sp|P09769|FGR_HUMAN	FGR_HUMAN	Tyrosine-protein kinase Fgr OS=Homo sapiens GN=FGR PE=1 SV=2	2	-4.89955	0.424899	-11.5311	9	1.08049e-06	4.59207e-06
sp|P54756|EPHA5_HUMAN	EPHA5_HUMAN	Ephrin type-A receptor 5 OS=Homo sapiens GN=EPHA5 PE=1 SV=3	2	-4.79225	1.25072	-3.8316	10	0.00331018	0.00738007
sp|P54760|EPHB4_HUMAN	EPHB4_HUMAN	Ephrin type-B receptor 4 OS=Homo sapiens GN=EPHB4 PE=1 SV=2	10	-4.35694	0.320058	-13.613	39	2.22045e-16	2.157e-15
sp|P21709|EPHA1_HUMAN	EPHA1_HUMAN	Ephrin type-A receptor 1 OS=Homo sapiens GN=EPHA1 PE=1 SV=4	3	-4.07016	0.752003	-5.41242	15	7.19798e-05	0.000199781
sp|P29323|EPHB2_HUMAN	EPHB2_HUMAN	Ephrin type-B receptor 2 OS=Homo sapiens GN=EPHB2 PE=1 SV=5	31	-4.00491	0.186822	-21.4371	192	0	0
sp|P06239|LCK_HUMAN	LCK_HUMAN	Tyrosine-protein kinase Lck OS=Homo sapiens GN=LCK PE=1 SV=6	7	-3.69609	0.874061	-4.22864	33	0.000175045	0.000449172
sp|P49336|CDK8_HUMAN	CDK8_HUMAN	Cyclin-dependent kinase 8 OS=Homo sapiens GN=CDK8 PE=1 SV=1	2	-2.89998	0.506251	-5.72834	13	6.95613e-05	0.000199781
sp|P42685|FRK_HUMAN	FRK_HUMAN	Tyrosine-protein kinase FRK OS=Homo sapiens GN=FRK PE=1 SV=1	9	-2.78423	0.608235	-4.57756	51	3.04749e-05	9.4195e-05
sp|Q9Y2U5|M3K2_HUMAN	M3K2_HUMAN	Mitogen-activated protein kinase kinase kinase 2 OS=Homo sapiens GN=MAP3K2 PE=1 SV=2	2	-1.64476	0.0962038	-17.0966	11	2.8547e-09	1.49323e-08
sp|P41240|CSK_HUMAN	CSK_HUMAN	Tyrosine-protein kinase CSK OS=Homo sapiens GN=CSK PE=1 SV=1	22	-1.4629	0.158548	-9.22689	143	4.44089e-16	4.02641e-15
sp|O76039|CDKL5_HUMAN	CDKL5_HUMAN	Cyclin-dependent kinase-like 5 OS=Homo sapiens GN=CDKL5 PE=1 SV=1	2	-0.602396	0.139873	-4.30672	12	0.00101972	0.00239107
sp|Q96SB4|SRPK1_HUMAN	SRPK1_HUMAN	SRSF protein kinase 1 OS=Homo sapiens GN=SRPK1 PE=1 SV=2	3	-0.558507	0.0992933	-5.62482	18	2.45191e-05	7.75486e-05
sp|Q00534|CDK6_HUMAN	CDK6_HUMAN	Cyclin-dependent kinase 6 OS=Homo sapiens GN=CDK6 PE=1 SV=1	20	0.579288	0.111113	5.21353	163	5.54951e-07	2.51578e-06
sp|P37173|TGFR2_HUMAN	TGFR2_HUMAN	TGF-beta receptor type-2 OS=Homo sapiens GN=TGFBR2 PE=1 SV=2	20	0.588106	0.0927652	6.33973	134	3.25882e-09	1.64148e-08
sp|P06493|CDK1_HUMAN	CDK1_HUMAN	Cyclin-dependent kinase 1 OS=Homo sapiens GN=CDK1 PE=1 SV=3	24	0.611405	0.0976851	6.25894	213	2.10141e-09	1.14317e-08
sp|P19784|CSK22_HUMAN	CSK22_HUMAN	Casein kinase II subunit alpha' OS=Homo sapiens GN=CSNK2A2 PE=1 SV=1	23	0.642674	0.0739306	8.69293	219	8.88178e-16	7.54952e-15
sp|P68400|CSK21_HUMAN	CSK21_HUMAN	Casein kinase II subunit alpha OS=Homo sapiens GN=CSNK2A1 PE=1 SV=1	4	0.668014	0.172374	3.87538	42	0.000367292	0.000891994
sp|O14578|CTRO_HUMAN	CTRO_HUMAN	Citron Rho-interacting kinase OS=Homo sapiens GN=CIT PE=1 SV=2	2	0.691939	0.178311	3.88052	10	0.00305636	0.00692776
sp|Q9BVS4|RIOK2_HUMAN	RIOK2_HUMAN	Serine/threonine-protein kinase RIO2 OS=Homo sapiens GN=RIOK2 PE=1 SV=2	26	0.697346	0.189648	3.67707	167	0.000317757	0.000785725
sp|P45984|MK09_HUMAN	MK09_HUMAN	Mitogen-activated protein kinase 9 OS=Homo sapiens GN=MAPK9 PE=1 SV=2	9	0.70278	0.166536	4.21998	59	8.54242e-05	0.000232354
sp|Q7KZI7|MARK2_HUMAN	MARK2_HUMAN	Serine/threonine-protein kinase MARK2 OS=Homo sapiens GN=MARK2 PE=1 SV=2	16	0.708296	0.156009	4.54008	105	1.50425e-05	5.38362e-05
sp|P50750|CDK9_HUMAN	CDK9_HUMAN	Cyclin-dependent kinase 9 OS=Homo sapiens GN=CDK9 PE=1 SV=3	11	0.72505	0.259877	2.78997	81	0.00657003	0.0131401
sp|Q13873|BMPR2_HUMAN	BMPR2_HUMAN	Bone morphogenetic protein receptor type-2 OS=Homo sapiens GN=BMPR2 PE=1 SV=2	12	0.753732	0.167992	4.48672	82	2.33514e-05	7.74582e-05
sp|P30530|UFO_HUMAN	UFO_HUMAN	Tyrosine-protein kinase receptor UFO OS=Homo sapiens GN=AXL PE=1 SV=3	29	0.753793	0.112389	6.70701	198	2.03188e-10	1.20146e-09
sp|Q13188|STK3_HUMAN	STK3_HUMAN	Serine/threonine-protein kinase 3 OS=Homo sapiens GN=STK3 PE=1 SV=2	2	0.803364	0.0725524	11.0729	10	6.19951e-07	2.71979e-06
sp|Q02750|MP2K1_HUMAN	MP2K1_HUMAN	Dual specificity mitogen-activated protein kinase kinase 1 OS=Homo sapiens GN=MAP2K1 PE=1 SV=2	5	0.811446	0.218063	3.72115	29	0.000848184	0.00202374
sp|Q9Y6M4|KC1G3_HUMAN	KC1G3_HUMAN	Casein kinase I isoform gamma-3 OS=Homo sapiens GN=CSNK1G3 PE=1 SV=2	13	0.834356	0.170241	4.90102	91	4.13356e-06	1.60618e-05
sp|O94804|STK10_HUMAN	STK10_HUMAN	Serine/threonine-protein kinase 10 OS=Homo sapiens GN=STK10 PE=1 SV=1	7	0.867471	0.268556	3.23013	39	0.00251404	0.00579508
sp|Q8IVH8|M4K3_HUMAN	M4K3_HUMAN	Mitogen-activated protein kinase kinase kinase kinase 3 OS=Homo sapiens GN=MAP4K3 PE=1 SV=1	11	0.884057	0.306613	2.8833	66	0.00530763	0.0107737
sp|P49674|KC1E_HUMAN	KC1E_HUMAN	Casein kinase I isoform epsilon OS=Homo sapiens GN=CSNK1E PE=1 SV=1	4	0.911785	0.290494	3.13874	23	0.00460414	0.00963328
sp|P50613|CDK7_HUMAN	CDK7_HUMAN	Cyclin-dependent kinase 7 OS=Homo sapiens GN=CDK7 PE=1 SV=1	14	0.939734	0.127116	7.39271	107	3.36629e-11	2.08098e-10
sp|P08581|MET_HUMAN	MET_HUMAN	Hepatocyte growth factor receptor OS=Homo sapiens GN=MET PE=1 SV=4	52	0.96937	0.0767408	12.6317	419	0	0
sp|P22694|KAPCB_HUMAN	KAPCB_HUMAN	cAMP-dependent protein kinase catalytic subunit beta OS=Homo sapiens GN=PRKACB PE=1 SV=2	6	0.98654	0.110856	8.89929	54	3.58691e-12	2.4391e-11
sp|P11802|CDK4_HUMAN	CDK4_HUMAN	Cyclin-dependent kinase 4 OS=Homo sapiens GN=CDK4 PE=1 SV=2	13	1.02976	0.238903	4.31037	90	4.15703e-05	0.000125635
sp|P27448|MARK3_HUMAN	MARK3_HUMAN	MAP/microtubule affinity-regulating kinase 3 OS=Homo sapiens GN=MARK3 PE=1 SV=4	12	1.03783	0.342964	3.02607	74	0.00340666	0.00747268
sp|Q96GD4|AURKB_HUMAN	AURKB_HUMAN	Aurora kinase B OS=Homo sapiens GN=AURKB PE=1 SV=3	13	1.09234	0.263514	4.14527	101	7.07243e-05	0.000199781
sp|O14976|GAK_HUMAN	GAK_HUMAN	Cyclin-G-associated kinase OS=Homo sapiens GN=GAK PE=1 SV=2	8	1.14793	0.190984	6.0106	62	1.0682e-07	5.00949e-07
sp|Q16513|PKN2_HUMAN	PKN2_HUMAN	Serine/threonine-protein kinase N2 OS=Homo sapiens GN=PKN2 PE=1 SV=1	10	1.15996	0.247186	4.69264	58	1.68923e-05	5.89066e-05
sp|Q00535|CDK5_HUMAN	CDK5_HUMAN	Cyclin-dependent kinase 5 OS=Homo sapiens GN=CDK5 PE=1 SV=3	16	1.23798	0.280093	4.41989	125	2.11843e-05	7.20265e-05
sp|P49841|GSK3B_HUMAN	GSK3B_HUMAN	Glycogen synthase kinase-3 beta OS=Homo sapiens GN=GSK3B PE=1 SV=2	20	1.25775	0.0802693	15.6691	182	0	0
sp|Q16539|MK14_HUMAN	MK14_HUMAN	Mitogen-activated protein kinase 14 OS=Homo sapiens GN=MAPK14 PE=1 SV=3	21	1.26475	0.0692189	18.2718	203	0	0
sp|O14965|AURKA_HUMAN	AURKA_HUMAN	Aurora kinase A OS=Homo sapiens GN=AURKA PE=1 SV=2	14	1.27901	0.144365	8.85958	112	1.39888e-14	1.05693e-13
sp|P24941|CDK2_HUMAN	CDK2_HUMAN	Cyclin-dependent kinase 2 OS=Homo sapiens GN=CDK2 PE=1 SV=2	15	1.31983	0.124241	10.6231	103	0	0
sp|Q9NYL2|MLTK_HUMAN	MLTK_HUMAN	Mitogen-activated protein kinase kinase kinase MLT OS=Homo sapiens GN=MLTK PE=1 SV=3	13	1.32859	0.150039	8.85496	73	3.48388e-13	2.49372e-12
sp|P36507|MP2K2_HUMAN	MP2K2_HUMAN	Dual specificity mitogen-activated protein kinase kinase 2 OS=Homo sapiens GN=MAP2K2 PE=1 SV=1	7	1.34404	0.246154	5.46016	39	2.90714e-06	1.19809e-05
sp|P48729|KC1A_HUMAN	KC1A_HUMAN	Casein kinase I isoform alpha OS=Homo sapiens GN=CSNK1A1 PE=1 SV=2	8	1.36751	0.0717603	19.0566	66	0	0
sp|Q8TD19|NEK9_HUMAN	NEK9_HUMAN	Serine/threonine-protein kinase Nek9 OS=Homo sapiens GN=NEK9 PE=1 SV=2	37	1.38667	0.210251	6.59529	225	2.99168e-10	1.69528e-09
sp|O96013|PAK4_HUMAN	PAK4_HUMAN	Serine/threonine-protein kinase PAK 4 OS=Homo sapiens GN=PAK4 PE=1 SV=1	20	1.52833	0.135524	11.2772	145	0	0
sp|P48730|KC1D_HUMAN	KC1D_HUMAN	Casein kinase I isoform delta OS=Homo sapiens GN=CSNK1D PE=1 SV=2	10	1.56368	0.407563	3.83666	58	0.000310239	0.000781344
sp|Q9NSY1|BMP2K_HUMAN	BMP2K_HUMAN	BMP-2-inducible protein kinase OS=Homo sapiens GN=BMP2K PE=1 SV=2	11	1.60233	0.193414	8.28446	66	8.20188e-12	5.3117e-11
sp|P28482|MK01_HUMAN	MK01_HUMAN	Mitogen-activated protein kinase 1 OS=Homo sapiens GN=MAPK1 PE=1 SV=3	16	1.90526	0.2123	8.97435	120	4.66294e-15	3.73035e-14
sp|Q13557|KCC2D_HUMAN	KCC2D_HUMAN	Calcium/calmodulin-dependent protein kinase type II subunit delta OS=Homo sapiens GN=CAMK2D PE=1 SV=3	21	2.02436	0.347543	5.82477	126	4.4862e-08	2.17901e-07
sp|P06213|INSR_HUMAN	INSR_HUMAN	Insulin receptor OS=Homo sapiens GN=INSR PE=1 SV=4	4	2.13786	0.373619	5.72205	23	7.92827e-06	2.99512e-05
sp|Q00536|CDK16_HUMAN	CDK16_HUMAN	Cyclin-dependent kinase 16 OS=Homo sapiens GN=CDK16 PE=1 SV=1	5	2.23133	0.431908	5.16621	25	2.4257e-05	7.75486e-05
sp|Q9Y5S2|MRCKB_HUMAN	MRCKB_HUMAN	Serine/threonine-protein kinase MRCK beta OS=Homo sapiens GN=CDC42BPB PE=1 SV=2	3	2.54196	0.949349	2.67758	13	0.0189882	0.0374259
sp|O95819|M4K4_HUMAN	M4K4_HUMAN	Mitogen-activated protein kinase kinase kinase kinase 4 OS=Homo sapiens GN=MAP4K4 PE=1 SV=2	4	2.71224	0.439865	6.16607	22	3.31394e-06	1.32558e-05
sp|Q13555|KCC2G_HUMAN	KCC2G_HUMAN	Calcium/calmodulin-dependent protein kinase type II subunit gamma OS=Homo sapiens GN=CAMK2G PE=1 SV=3	19	3.13335	0.162797	19.247	131	0	0

## Sheet: RBE
RBE - DMSO vs Dasatinib
Protein	Gene	Description	PeptideCount	log2FC	SE	Tvalue	DF	pvalue	adj.pvalue
sp|P12931|SRC_HUMAN	SRC_HUMAN	Proto-oncogene tyrosine-protein kinase Src OS=Homo sapiens GN=SRC PE=1 SV=3	22	-5.78894	0.210173	-27.5437	121	0	0
sp|P07947|YES_HUMAN	YES_HUMAN	Tyrosine-protein kinase Yes OS=Homo sapiens GN=YES1 PE=1 SV=3	17	-5.46596	0.385405	-14.1824	81	0	0
sp|P07948|LYN_HUMAN	LYN_HUMAN	Tyrosine-protein kinase Lyn OS=Homo sapiens GN=LYN PE=1 SV=3	15	-5.02674	0.335842	-14.9676	75	0	0
sp|P29317|EPHA2_HUMAN	EPHA2_HUMAN	Ephrin type-A receptor 2 OS=Homo sapiens GN=EPHA2 PE=1 SV=2	34	-4.61658	0.210925	-21.8874	198	0	0
sp|Q08345|DDR1_HUMAN	DDR1_HUMAN	Epithelial discoidin domain-containing receptor 1 OS=Homo sapiens GN=DDR1 PE=1 SV=1	9	-3.65413	0.286373	-12.76	44	2.22045e-16	3.77476e-15
sp|P42684|ABL2_HUMAN	ABL2_HUMAN	Abelson tyrosine-protein kinase 2 OS=Homo sapiens GN=ABL2 PE=1 SV=1	5	-3.54476	0.476827	-7.43406	24	1.12766e-07	7.30291e-07
sp|P29323|EPHB2_HUMAN	EPHB2_HUMAN	Ephrin type-B receptor 2 OS=Homo sapiens GN=EPHB2 PE=1 SV=5	31	-3.13266	0.221736	-14.1279	192	0	0
sp|P00519|ABL1_HUMAN	ABL1_HUMAN	Tyrosine-protein kinase ABL1 OS=Homo sapiens GN=ABL1 PE=1 SV=4	3	-2.90766	0.214161	-13.577	17	1.48904e-10	1.55776e-09
sp|P09769|FGR_HUMAN	FGR_HUMAN	Tyrosine-protein kinase Fgr OS=Homo sapiens GN=FGR PE=1 SV=2	2	-2.59404	0.523294	-4.95714	9	0.000783585	0.00222016
sp|P41240|CSK_HUMAN	CSK_HUMAN	Tyrosine-protein kinase CSK OS=Homo sapiens GN=CSK PE=1 SV=1	22	-2.00763	0.140559	-14.2832	143	0	0
sp|Q8NI60|ADCK3_HUMAN	ADCK3_HUMAN	Chaperone activity of bc1 complex-like, mitochondrial OS=Homo sapiens GN=ADCK3 PE=1 SV=1	3	-1.82491	0.517679	-3.52518	16	0.00281007	0.0070772
sp|P54760|EPHB4_HUMAN	EPHB4_HUMAN	Ephrin type-B receptor 4 OS=Homo sapiens GN=EPHB4 PE=1 SV=2	10	-1.69879	0.372711	-4.55792	39	4.99703e-05	0.00019417
sp|O43353|RIPK2_HUMAN	RIPK2_HUMAN	Receptor-interacting serine/threonine-protein kinase 2 OS=Homo sapiens GN=RIPK2 PE=1 SV=2	24	-1.03092	0.0943988	-10.9209	186	0	0
sp|P24941|CDK2_HUMAN	CDK2_HUMAN	Cyclin-dependent kinase 2 OS=Homo sapiens GN=CDK2 PE=1 SV=2	15	-0.514	0.127086	-4.0445	103	0.000101456	0.000363107
sp|Q02156|KPCE_HUMAN	KPCE_HUMAN	Protein kinase C epsilon type OS=Homo sapiens GN=PRKCE PE=1 SV=1	3	0.503511	0.0847898	5.93835	18	1.27899e-05	5.61107e-05
sp|P49841|GSK3B_HUMAN	GSK3B_HUMAN	Glycogen synthase kinase-3 beta OS=Homo sapiens GN=GSK3B PE=1 SV=2	20	0.54329	0.0785254	6.91865	182	7.50702e-11	8.50795e-10
sp|Q9Y4K4|M4K5_HUMAN	M4K5_HUMAN	Mitogen-activated protein kinase kinase kinase kinase 5 OS=Homo sapiens GN=MAP4K5 PE=1 SV=1	9	0.590838	0.133145	4.43756	46	5.64098e-05	0.000213104
sp|O95819|M4K4_HUMAN	M4K4_HUMAN	Mitogen-activated protein kinase kinase kinase kinase 4 OS=Homo sapiens GN=MAP4K4 PE=1 SV=2	4	0.646376	0.199824	3.23473	22	0.00380707	0.00908354
sp|Q9Y6M4|KC1G3_HUMAN	KC1G3_HUMAN	Casein kinase I isoform gamma-3 OS=Homo sapiens GN=CSNK1G3 PE=1 SV=2	13	0.722346	0.242348	2.98061	91	0.00368954	0.00896031
sp|P36896|ACV1B_HUMAN	ACV1B_HUMAN	Activin receptor type-1B OS=Homo sapiens GN=ACVR1B PE=1 SV=1	2	0.722815	0.0789993	9.14963	12	9.27326e-07	5.04465e-06
sp|P49674|KC1E_HUMAN	KC1E_HUMAN	Casein kinase I isoform epsilon OS=Homo sapiens GN=CSNK1E PE=1 SV=1	4	0.725757	0.287651	2.52305	23	0.0190014	0.040378
sp|O75676|KS6A4_HUMAN	KS6A4_HUMAN	Ribosomal protein S6 kinase alpha-4 OS=Homo sapiens GN=RPS6KA4 PE=1 SV=1	11	0.747774	0.16574	4.51173	64	2.8135e-05	0.00011595
sp|O60285|NUAK1_HUMAN	NUAK1_HUMAN	NUAK family SNF1-like kinase 1 OS=Homo sapiens GN=NUAK1 PE=1 SV=1	8	0.823332	0.32715	2.51668	46	0.0153967	0.034327
sp|Q00537|CDK17_HUMAN	CDK17_HUMAN	Cyclin-dependent kinase 17 OS=Homo sapiens GN=CDK17 PE=1 SV=2	3	0.84152	0.338889	2.48318	18	0.0231011	0.0483347
sp|Q7L7X3|TAOK1_HUMAN	TAOK1_HUMAN	Serine/threonine-protein kinase TAO1 OS=Homo sapiens GN=TAOK1 PE=1 SV=1	4	0.849378	0.226582	3.74865	35	0.000641644	0.00185667
sp|Q9Y2U5|M3K2_HUMAN	M3K2_HUMAN	Mitogen-activated protein kinase kinase kinase 2 OS=Homo sapiens GN=MAP3K2 PE=1 SV=2	2	0.857592	0.175571	4.88457	11	0.000483346	0.00142902
sp|Q9UHD2|TBK1_HUMAN	TBK1_HUMAN	Serine/threonine-protein kinase TBK1 OS=Homo sapiens GN=TBK1 PE=1 SV=1	21	0.880355	0.176154	4.99765	117	2.05481e-06	9.98052e-06
sp|P50750|CDK9_HUMAN	CDK9_HUMAN	Cyclin-dependent kinase 9 OS=Homo sapiens GN=CDK9 PE=1 SV=3	11	0.90608	0.130004	6.96962	81	7.71828e-10	6.56054e-09
sp|Q8TD19|NEK9_HUMAN	NEK9_HUMAN	Serine/threonine-protein kinase Nek9 OS=Homo sapiens GN=NEK9 PE=1 SV=2	37	0.942005	0.142375	6.61637	225	2.65554e-10	2.57967e-09
sp|P16591|FER_HUMAN	FER_HUMAN	Tyrosine-protein kinase Fer OS=Homo sapiens GN=FER PE=1 SV=2	25	0.986532	0.315875	3.12318	168	0.00210743	0.00561981
sp|P68400|CSK21_HUMAN	CSK21_HUMAN	Casein kinase II subunit alpha OS=Homo sapiens GN=CSNK2A1 PE=1 SV=1	4	0.994886	0.194776	5.10785	42	7.49568e-06	3.39804e-05
sp|Q96SB4|SRPK1_HUMAN	SRPK1_HUMAN	SRSF protein kinase 1 OS=Homo sapiens GN=SRPK1 PE=1 SV=2	3	1.02048	0.0986265	10.3469	18	5.27061e-09	4.21649e-08
sp|Q16513|PKN2_HUMAN	PKN2_HUMAN	Serine/threonine-protein kinase N2 OS=Homo sapiens GN=PKN2 PE=1 SV=1	10	1.05215	0.193808	5.42884	58	1.16545e-06	6.09619e-06
sp|P78368|KC1G2_HUMAN	KC1G2_HUMAN	Casein kinase I isoform gamma-2 OS=Homo sapiens GN=CSNK1G2 PE=1 SV=1	4	1.05748	0.399129	2.64946	20	0.0153844	0.034327
sp|O14976|GAK_HUMAN	GAK_HUMAN	Cyclin-G-associated kinase OS=Homo sapiens GN=GAK PE=1 SV=2	8	1.12229	0.15212	7.37764	62	4.76282e-10	4.31829e-09
sp|O15530|PDPK1_HUMAN	PDPK1_HUMAN	3-phosphoinositide-dependent protein kinase 1 OS=Homo sapiens GN=PDPK1 PE=1 SV=1	7	1.13159	0.117708	9.61354	47	1.12488e-12	1.39076e-11
sp|Q9NSY1|BMP2K_HUMAN	BMP2K_HUMAN	BMP-2-inducible protein kinase OS=Homo sapiens GN=BMP2K PE=1 SV=2	11	1.13324	0.241181	4.6987	66	1.37389e-05	5.83902e-05
sp|Q15418|KS6A1_HUMAN	KS6A1_HUMAN	Ribosomal protein S6 kinase alpha-1 OS=Homo sapiens GN=RPS6KA1 PE=1 SV=2	3	1.16687	0.235453	4.95587	15	0.000172528	0.000558663
sp|Q04912|RON_HUMAN	RON_HUMAN	Macrophage-stimulating protein receptor OS=Homo sapiens GN=MST1R PE=1 SV=2	19	1.17039	0.320693	3.64956	100	0.000419741	0.00126855
sp|Q7KZI7|MARK2_HUMAN	MARK2_HUMAN	Serine/threonine-protein kinase MARK2 OS=Homo sapiens GN=MARK2 PE=1 SV=2	16	1.18884	0.206523	5.75644	105	8.60013e-08	5.84809e-07
sp|Q9H093|NUAK2_HUMAN	NUAK2_HUMAN	NUAK family SNF1-like kinase 2 OS=Homo sapiens GN=NUAK2 PE=1 SV=1	4	1.24876	0.188554	6.62284	21	1.47697e-06	7.43958e-06
sp|P51955|NEK2_HUMAN	NEK2_HUMAN	Serine/threonine-protein kinase Nek2 OS=Homo sapiens GN=NEK2 PE=1 SV=1	5	1.42639	0.398235	3.58177	23	0.00157898	0.00429481
sp|P51812|KS6A3_HUMAN	KS6A3_HUMAN	Ribosomal protein S6 kinase alpha-3 OS=Homo sapiens GN=RPS6KA3 PE=1 SV=1	9	1.4598	0.237793	6.13893	45	1.9414e-07	1.20014e-06
sp|P78527|PRKDC_HUMAN	PRKDC_HUMAN	DNA-dependent protein kinase catalytic subunit OS=Homo sapiens GN=PRKDC PE=1 SV=3	43	1.52979	0.194421	7.86843	246	1.13687e-13	1.71793e-12
sp|P17612|KAPCA_HUMAN	KAPCA_HUMAN	cAMP-dependent protein kinase catalytic subunit alpha OS=Homo sapiens GN=PRKACA PE=1 SV=2	10	1.54662	0.172504	8.9657	74	1.93179e-13	2.62723e-12
sp|O75582|KS6A5_HUMAN	KS6A5_HUMAN	Ribosomal protein S6 kinase alpha-5 OS=Homo sapiens GN=RPS6KA5 PE=1 SV=1	5	1.7221	0.616834	2.79183	27	0.00950852	0.021918
sp|Q13233|M3K1_HUMAN	M3K1_HUMAN	Mitogen-activated protein kinase kinase kinase 1 OS=Homo sapiens GN=MAP3K1 PE=1 SV=4	14	1.74129	0.329547	5.28389	94	8.16147e-07	4.62483e-06
sp|Q00536|CDK16_HUMAN	CDK16_HUMAN	Cyclin-dependent kinase 16 OS=Homo sapiens GN=CDK16 PE=1 SV=1	5	1.76618	0.387793	4.55444	25	0.000118265	0.000402101
sp|Q13131|AAPK1_HUMAN	AAPK1_HUMAN	5'-AMP-activated protein kinase catalytic subunit alpha-1 OS=Homo sapiens GN=PRKAA1 PE=1 SV=4	13	1.77386	0.28009	6.33317	97	7.49956e-09	5.66633e-08
sp|P53779|MK10_HUMAN	MK10_HUMAN	Mitogen-activated protein kinase 10 OS=Homo sapiens GN=MAPK10 PE=1 SV=2	1	2.34499	0.587084	3.9943	4	0.0162068	0.0355504
sp|Q9BWU1|CDK19_HUMAN	CDK19_HUMAN	Cyclin-dependent kinase 19 OS=Homo sapiens GN=CDK19 PE=1 SV=1	1	2.79998	0.546415	5.12428	6	0.00216912	0.00567309
sp|O14936|CSKP_HUMAN	CSKP_HUMAN	Peripheral plasma membrane protein CASK OS=Homo sapiens GN=CASK PE=1 SV=3	1	3.78515	0.343553	11.0176	5	0.000107219	0.000373891

## Sheet: SNU-1079
SNU-1079 - DMSO vs Dasatinib
Protein	Gene	Description	PeptideCount	Label	log2FC	SE	Tvalue	DF	pvalue	adj.pvalue
sp|P12931|SRC_HUMAN	SRC_HUMAN	Proto-oncogene tyrosine-protein kinase Src OS=Homo sapiens GN=SRC PE=1 SV=3	22	snu-dmso	-6.35029	0.216363	-29.3502	121	0	0
sp|P07947|YES_HUMAN	YES_HUMAN	Tyrosine-protein kinase Yes OS=Homo sapiens GN=YES1 PE=1 SV=3	17	snu-dmso	-6.01383	0.37089	-16.2146	81	0	0
sp|P07948|LYN_HUMAN	LYN_HUMAN	Tyrosine-protein kinase Lyn OS=Homo sapiens GN=LYN PE=1 SV=3	15	snu-dmso	-5.29619	0.338567	-15.6429	75	0	0
sp|Q08345|DDR1_HUMAN	DDR1_HUMAN	Epithelial discoidin domain-containing receptor 1 OS=Homo sapiens GN=DDR1 PE=1 SV=1	9	snu-dmso	-5.1006	0.243107	-20.9809	44	0	0
sp|P54760|EPHB4_HUMAN	EPHB4_HUMAN	Ephrin type-B receptor 4 OS=Homo sapiens GN=EPHB4 PE=1 SV=2	10	snu-dmso	-4.4772	0.337549	-13.2639	39	4.44089e-16	5.49056e-15
sp|P54756|EPHA5_HUMAN	EPHA5_HUMAN	Ephrin type-A receptor 5 OS=Homo sapiens GN=EPHA5 PE=1 SV=3	2	snu-dmso	-4.2264	0.244351	-17.2965	10	8.83211e-09	7.06569e-08
sp|P29323|EPHB2_HUMAN	EPHB2_HUMAN	Ephrin type-B receptor 2 OS=Homo sapiens GN=EPHB2 PE=1 SV=5	31	snu-dmso	-3.99282	0.143832	-27.7603	192	0	0
sp|P54762|EPHB1_HUMAN	EPHB1_HUMAN	Ephrin type-B receptor 1 OS=Homo sapiens GN=EPHB1 PE=1 SV=1	6	snu-dmso	-3.8469	0.880461	-4.36919	29	0.000145666	0.000535422
sp|P42685|FRK_HUMAN	FRK_HUMAN	Tyrosine-protein kinase FRK OS=Homo sapiens GN=FRK PE=1 SV=1	9	snu-dmso	-3.60125	0.57259	-6.28941	51	7.20179e-08	4.89722e-07
sp|P42684|ABL2_HUMAN	ABL2_HUMAN	Abelson tyrosine-protein kinase 2 OS=Homo sapiens GN=ABL2 PE=1 SV=1	5	snu-dmso	-3.27472	0.533448	-6.13878	24	2.42456e-06	1.31896e-05
sp|Q15131|CDK10_HUMAN	CDK10_HUMAN	Cyclin-dependent kinase 10 OS=Homo sapiens GN=CDK10 PE=1 SV=1	3	snu-dmso	-3.24136	0.464198	-6.98271	14	6.42144e-06	3.11898e-05
sp|O14578|CTRO_HUMAN	CTRO_HUMAN	Citron Rho-interacting kinase OS=Homo sapiens GN=CIT PE=1 SV=2	2	snu-dmso	-2.59047	0.262054	-9.88526	10	1.76672e-06	1.00114e-05
sp|P00519|ABL1_HUMAN	ABL1_HUMAN	Tyrosine-protein kinase ABL1 OS=Homo sapiens GN=ABL1 PE=1 SV=4	3	snu-dmso	-2.23317	0.487671	-4.57925	17	0.000266593	0.000884308
sp|P29317|EPHA2_HUMAN	EPHA2_HUMAN	Ephrin type-A receptor 2 OS=Homo sapiens GN=EPHA2 PE=1 SV=2	34	snu-dmso	-2.1839	0.229802	-9.50341	198	0	0
sp|P49336|CDK8_HUMAN	CDK8_HUMAN	Cyclin-dependent kinase 8 OS=Homo sapiens GN=CDK8 PE=1 SV=1	2	snu-dmso	-1.73845	0.348238	-4.99213	13	0.000246356	0.000852637
sp|O14936|CSKP_HUMAN	CSKP_HUMAN	Peripheral plasma membrane protein CASK OS=Homo sapiens GN=CASK PE=1 SV=3	1	snu-dmso	-0.902299	0.28051	-3.21664	5	0.0235537	0.0485349
sp|P49674|KC1E_HUMAN	KC1E_HUMAN	Casein kinase I isoform epsilon OS=Homo sapiens GN=CSNK1E PE=1 SV=1	4	snu-dmso	-0.81286	0.297204	-2.73503	23	0.0118004	0.0267476
sp|P08069|IGF1R_HUMAN	IGF1R_HUMAN	Insulin-like growth factor 1 receptor OS=Homo sapiens GN=IGF1R PE=1 SV=1	8	snu-dmso	-0.8046	0.254535	-3.16106	47	0.00275077	0.00719433
sp|Q9UL54|TAOK2_HUMAN	TAOK2_HUMAN	Serine/threonine-protein kinase TAO2 OS=Homo sapiens GN=TAOK2 PE=1 SV=2	4	snu-dmso	-0.722064	0.255666	-2.82425	21	0.0101612	0.0234225
sp|Q02156|KPCE_HUMAN	KPCE_HUMAN	Protein kinase C epsilon type OS=Homo sapiens GN=PRKCE PE=1 SV=1	3	snu-dmso	-0.62912	0.0638154	-9.85844	18	1.11171e-08	8.39958e-08
sp|P17612|KAPCA_HUMAN	KAPCA_HUMAN	cAMP-dependent protein kinase catalytic subunit alpha OS=Homo sapiens GN=PRKACA PE=1 SV=2	10	snu-dmso	0.626365	0.126527	4.95046	74	4.52258e-06	2.27804e-05
sp|P27361|MK03_HUMAN	MK03_HUMAN	Mitogen-activated protein kinase 3 OS=Homo sapiens GN=MAPK3 PE=1 SV=4	2	snu-dmso	0.651247	0.132291	4.92285	18	0.000109743	0.000426431
sp|P19784|CSK22_HUMAN	CSK22_HUMAN	Casein kinase II subunit alpha' OS=Homo sapiens GN=CSNK2A2 PE=1 SV=1	23	snu-dmso	0.655844	0.0695556	9.42906	219	0	0
sp|Q13131|AAPK1_HUMAN	AAPK1_HUMAN	5'-AMP-activated protein kinase catalytic subunit alpha-1 OS=Homo sapiens GN=PRKAA1 PE=1 SV=4	13	snu-dmso	0.669971	0.196352	3.4121	97	0.000941596	0.00278385
sp|P45984|MK09_HUMAN	MK09_HUMAN	Mitogen-activated protein kinase 9 OS=Homo sapiens GN=MAPK9 PE=1 SV=2	9	snu-dmso	0.672794	0.154523	4.354	59	5.39695e-05	0.000229371
sp|Q13555|KCC2G_HUMAN	KCC2G_HUMAN	Calcium/calmodulin-dependent protein kinase type II subunit gamma OS=Homo sapiens GN=CAMK2G PE=1 SV=3	19	snu-dmso	0.678922	0.149468	4.54227	131	1.24824e-05	5.65868e-05
sp|P30530|UFO_HUMAN	UFO_HUMAN	Tyrosine-protein kinase receptor UFO OS=Homo sapiens GN=AXL PE=1 SV=3	29	snu-dmso	0.695998	0.145223	4.79263	198	3.22544e-06	1.68715e-05
sp|Q05655|KPCD_HUMAN	KPCD_HUMAN	Protein kinase C delta type OS=Homo sapiens GN=PRKCD PE=1 SV=2	14	snu-dmso	0.696906	0.195476	3.56518	81	0.000613391	0.00189594
sp|Q9UHD2|TBK1_HUMAN	TBK1_HUMAN	Serine/threonine-protein kinase TBK1 OS=Homo sapiens GN=TBK1 PE=1 SV=1	21	snu-dmso	0.70331	0.196108	3.58635	117	0.000490555	0.00155152
sp|Q9NSY1|BMP2K_HUMAN	BMP2K_HUMAN	BMP-2-inducible protein kinase OS=Homo sapiens GN=BMP2K PE=1 SV=2	11	snu-dmso	0.717982	0.167862	4.27722	66	6.23995e-05	0.000257162
sp|Q13233|M3K1_HUMAN	M3K1_HUMAN	Mitogen-activated protein kinase kinase kinase 1 OS=Homo sapiens GN=MAP3K1 PE=1 SV=4	14	snu-dmso	0.7233	0.306361	2.36094	94	0.0202939	0.0432808
sp|P28482|MK01_HUMAN	MK01_HUMAN	Mitogen-activated protein kinase 1 OS=Homo sapiens GN=MAPK1 PE=1 SV=3	16	snu-dmso	0.766147	0.202986	3.77438	120	0.000250776	0.000852637
sp|Q16512|PKN1_HUMAN	PKN1_HUMAN	Serine/threonine-protein kinase N1 OS=Homo sapiens GN=PKN1 PE=1 SV=2	21	snu-dmso	0.770636	0.14587	5.28303	123	5.57624e-07	3.44713e-06
sp|Q15418|KS6A1_HUMAN	KS6A1_HUMAN	Ribosomal protein S6 kinase alpha-1 OS=Homo sapiens GN=RPS6KA1 PE=1 SV=2	3	snu-dmso	0.770701	0.218963	3.51979	15	0.00309528	0.00794261
sp|Q16539|MK14_HUMAN	MK14_HUMAN	Mitogen-activated protein kinase 14 OS=Homo sapiens GN=MAPK14 PE=1 SV=3	21	snu-dmso	0.77573	0.0509347	15.2299	203	0	0
sp|P16591|FER_HUMAN	FER_HUMAN	Tyrosine-protein kinase Fer OS=Homo sapiens GN=FER PE=1 SV=2	25	snu-dmso	0.824164	0.256766	3.20979	168	0.00159146	0.00441712
sp|Q00535|CDK5_HUMAN	CDK5_HUMAN	Cyclin-dependent kinase 5 OS=Homo sapiens GN=CDK5 PE=1 SV=3	16	snu-dmso	0.845599	0.166894	5.06669	125	1.41762e-06	8.38246e-06
sp|P51955|NEK2_HUMAN	NEK2_HUMAN	Serine/threonine-protein kinase Nek2 OS=Homo sapiens GN=NEK2 PE=1 SV=1	5	snu-dmso	0.887236	0.348925	2.54277	23	0.0181887	0.0398979
sp|Q9NYL2|MLTK_HUMAN	MLTK_HUMAN	Mitogen-activated protein kinase kinase kinase MLT OS=Homo sapiens GN=MLTK PE=1 SV=3	13	snu-dmso	0.911086	0.127981	7.11891	73	6.26671e-10	5.68181e-09
sp|P45983|MK08_HUMAN	MK08_HUMAN	Mitogen-activated protein kinase 8 OS=Homo sapiens GN=MAPK8 PE=1 SV=2	9	snu-dmso	0.915026	0.387967	2.35851	51	0.0222188	0.0464886
sp|Q8TD19|NEK9_HUMAN	NEK9_HUMAN	Serine/threonine-protein kinase Nek9 OS=Homo sapiens GN=NEK9 PE=1 SV=2	37	snu-dmso	0.935604	0.0969964	9.64576	225	0	0
sp|Q2M2I8|AAK1_HUMAN	AAK1_HUMAN	AP2-associated protein kinase 1 OS=Homo sapiens GN=AAK1 PE=1 SV=3	20	snu-dmso	0.948686	0.158801	5.97405	118	2.51162e-08	1.79779e-07
sp|P24941|CDK2_HUMAN	CDK2_HUMAN	Cyclin-dependent kinase 2 OS=Homo sapiens GN=CDK2 PE=1 SV=2	15	snu-dmso	1.01271	0.125897	8.04399	103	1.5552e-12	1.62698e-11
sp|O14976|GAK_HUMAN	GAK_HUMAN	Cyclin-G-associated kinase OS=Homo sapiens GN=GAK PE=1 SV=2	8	snu-dmso	1.09003	0.33372	3.26629	62	0.00177761	0.0048351
sp|Q02750|MP2K1_HUMAN	MP2K1_HUMAN	Dual specificity mitogen-activated protein kinase kinase 1 OS=Homo sapiens GN=MAP2K1 PE=1 SV=2	5	snu-dmso	1.16061	0.172802	6.71641	29	2.27894e-07	1.47589e-06
sp|Q05397|FAK1_HUMAN	FAK1_HUMAN	Focal adhesion kinase 1 OS=Homo sapiens GN=PTK2 PE=1 SV=2	28	snu-dmso	1.19498	0.257654	4.63794	153	7.49806e-06	3.51633e-05
sp|Q8NB16|MLKL_HUMAN	MLKL_HUMAN	Mixed lineage kinase domain-like protein OS=Homo sapiens GN=MLKL PE=1 SV=1	13	snu-dmso	1.2401	0.365423	3.39361	81	0.0010699	0.00309589
sp|P09769|FGR_HUMAN	FGR_HUMAN	Tyrosine-protein kinase Fgr OS=Homo sapiens GN=FGR PE=1 SV=2	2	snu-dmso	1.31477	0.487797	2.69532	9	0.0245814	0.0498966
sp|Q8IVH8|M4K3_HUMAN	M4K3_HUMAN	Mitogen-activated protein kinase kinase kinase kinase 3 OS=Homo sapiens GN=MAP4K3 PE=1 SV=1	11	snu-dmso	1.32141	0.319856	4.13126	66	0.00010374	0.000414958
sp|O75676|KS6A4_HUMAN	KS6A4_HUMAN	Ribosomal protein S6 kinase alpha-4 OS=Homo sapiens GN=RPS6KA4 PE=1 SV=1	11	snu-dmso	1.67294	0.19561	8.55244	64	3.43681e-12	3.33861e-11
sp|P78527|PRKDC_HUMAN	PRKDC_HUMAN	DNA-dependent protein kinase catalytic subunit OS=Homo sapiens GN=PRKDC PE=1 SV=3	43	snu-dmso	1.68329	0.208169	8.08614	246	2.79776e-14	3.1708e-13
sp|Q9Y5S2|MRCKB_HUMAN	MRCKB_HUMAN	Serine/threonine-protein kinase MRCK beta OS=Homo sapiens GN=CDC42BPB PE=1 SV=2	3	snu-dmso	2.1111	0.625517	3.37497	13	0.004976	0.0118726
