# Supplementary material for: Isocitrate Dehydrogenase Mutations Confer Dasatinib Hypersensitivity and SRC Dependence in Intrahepatic Cholangiocarcinoma
Source: Oxford University Press journal article supplement (doi:10.1158/2159-8290.cd-15-1442), 2016-05-26
Supplement: 21598290cd151442-sup-159120_2_supp_3483143_p6rp72.xlsx [file 21598290cd151442-sup-159120_2_supp_3483143_p6rp72.xlsx]

## Sheet: Sheet1
Supplementary Table 1. Biliary Tract Cancer Cell lines
Cell Line	Culture Medium	Origin	Source	Cell Bank Number	Authentication	Date of Authentication
EGI-1	50:50 DMEM/F12	Extrahepatic cholangiocarcinoma	DSMZ (Deutsche Sammlung von Mikroorganismen und Zellkulturen GmbH)	385	STR DNA typing by DSMZ	N.A.
HuCCT1	RPMI	Intrahepatic cholangiocarcinoma	Riken Bioresource Center	RCB1960	STR DNA typing by Riken	N.A.
CC-LP-1	DMEM	Intrahepatic cholangiocarcinoma	Kind gift from Dr. PJ Bosma, Academic Medical Center, Amsterdam, The Netherlands		STR DNA typing	2015-12-21
CC-SW-1	DMEM	Intrahepatic cholangiocarcinoma	Kind gift from Dr. PJ Bosma, Academic Medical Center, Amsterdam, The Netherlands		STR DNA typing	2015-12-21
G-415	RPMI	Gall bladder cancer	Riken Bioresource Center	RCB2640	STR DNA typing by Riken	N.A.
RBE	RPMI	Intrahepatic cholangiocarcinoma	Riken Bioresource Center	RCB1292	STR DNA typing by Riken	N.A.
SG231	500ml MEM, 2.5ml 10mg/mL gentamicin, 5mL 1M Hepes	Intrahepatic cholangiocarcinoma	Kind gift from Dr. A.J. Demetris, University of Pittsburgh, Pittsburgh, PA		STR DNA typing	2015-12-21
SSP-25	RPMI	Intrahepatic cholangiocarcinoma	Riken Bioresource Center	RCB1293	STR DNA typing by Riken	N.A.
TFK-1	RPMI	Extrahepatic cholangiocarcinoma	Riken Bioresource Center	RCB2537	STR DNA typing by Riken	N.A.
TGBC14TKB	DMEM	Gall bladder cancer	Riken Bioresource Center	RCB1186	STR DNA typing by Riken	N.A.
YSCCC	RPMI	Intrahepatic cholangiocarcinoma	Riken Bioresource Center	RCB1549	STR DNA typing by Riken	N.A.
SNU-245	RPMI	Extrahepatic cholangiocarcinoma	Korean Cell Line Bank	00245	STR DNA typing by KCLB	N.A.
SNU-308	RPMI	Gall bladder cancer	Korean Cell Line Bank	00308	STR DNA typing by KCLB	N.A.
SNU-478	RPMI	Ampulla of Vater	Korean Cell Line Bank	00478	STR DNA typing by KCLB	N.A.
SNU-869	RPMI	Ampulla of Vater	Korean Cell Line Bank	00869	STR DNA typing by KCLB	N.A.
SNU-1079	RPMI	Intrahepatic cholangiocarcinoma	Korean Cell Line Bank	01079	STR DNA typing by KCLB	N.A.
SNU-1196	RPMI	Extrahepatic cholangiocarcinoma	Korean Cell Line Bank	01196	STR DNA typing by KCLB	N.A.
TKKK	DMEM	Intrahepatic cholangiocarcinoma	Riken Bioresource Center	RCB1907	STR DNA typing by Riken	N.A.
HuH-28	DMEM	Intrahepatic cholangiocarcinoma	Riken Bioresource Center	RCB1943	STR DNA typing by Riken	N.A.
MMNK-1	DMEM	Immortalized Cholangiocytes	Kind gift from Dr. J Luyendyk, University of Kansas Medical Center, Kansas City, KS		STR DNA typing	2015-12-21
HKGZ-CC	DMEM	Intrahepatic cholangiocarcinoma	Kind gift from Drs. Xin-Yuan Guan and Stephanie Ma		STR DNA typing	2015-12-21
HT-1080	DMEM	Fibrosarcoma	ATCC	CCL-121	STR DNA typing by ATCC	N.A.
COR-L105	RPMI	Lung adenocarcinoma	European Collection of Authenticated Cell Cultures (ECACC)	92031918	STR DNA typing by ATCC	N.A.
SW-1353	DMEM	chondrosarcoma	ATCC	HTB-94	STR DNA typing by ATCC	N.A.
ICC1	RPMI	Intrahepatic cholangiocarcinoma	Intrahepatic cholangiocarcinoma		STR DNA typing	2016-02-23
ICC2	RPMI	Intrahepatic cholangiocarcinoma	Intrahepatic cholangiocarcinoma		STR DNA typing	2016-02-23
ICC5	RPMI	Intrahepatic cholangiocarcinoma	Intrahepatic cholangiocarcinoma		STR DNA typing	2016-02-23
