# Supplementary material for: Isocitrate Dehydrogenase Mutations Confer Dasatinib Hypersensitivity and SRC Dependence in Intrahepatic Cholangiocarcinoma
Source: Oxford University Press journal article supplement (doi:10.1158/2159-8290.cd-15-1442), 2016-05-26
Supplement: 21598290cd151442-sup-159120_2_supp_3483144_66r672.xlsx [file 21598290cd151442-sup-159120_2_supp_3483144_66r672.xlsx]

## Sheet: plasmids used
Cas9 expression plasmids used
plasmid #	name	description	publication (PMID)	addgene #
JDS246	pCMV-T7-hSpCas9-SV40NLS-3xFLAG	human expression vector for wild-type SpCas9	23792628	43861
MSP469	pCMV-T7-hSpCas9-VQR-SV40NLS-3xFLAG	human expression vector for SpCas9-VQR variant	26098369	65771
sgRNA expression plasmids used
plasmid #	target sequence (with PAM)	description	notes
BPK1913	GCGGGCTCTACATCGTCACTGAG	sgRNA plasmid for CSK, use with SpCas9-VQR
BPK1918	GATCATAACAGAGTACATGG	sgRNA plasmid for EPHA4, use with SpCas9
BPK1922	GATCCAATTTATATTATTACAGAG	sgRNA plasmid for FRK, use with SpCas9-VQR
BPK1925	GAGCCCATTTACATCGTCACGG	sgRNA plasmid for SRC, use with SpCas9
BPK1932	GAACCAATTTACATTGTCACTGAA	sgRNA plasmid #1 for YES1, use with SpCas9-VQR
BPK2841	GATTCAGTGACAATGTAAATTGG	sgRNA plasmid #2 for YES1, use with SpCas9	has 5' mismatched G (A>G)
BPK2824	GACTCAGTGATGATATAGAACGG	sgRNA plasmid for ABL1, use with SpCas9	has 5' mismatched G (A>G)
BPK2833	GTAGTCAGTAATCATGCAGAGGG	sgRNA plasmid for DDR1, use with SpCas9
BPK2828	GATTCAGTCACAATGTAAAATGG	sgRNA plasmid for ABL2, use with SpCas9	has 5' mismatched G (T>G)
BPK2837	GTACTCGATTATAATATAAATGG	sgRNA plasmid for LYN, use with SpCas9
